# Supplementary material for: Synthesis and evaluation of a boronate-tagged 1,8-naphthalimide probe for fluoride recognition
Source: Royal Society of Chemistry journal article supplement (doi:10.1039/c4ob02267j), 2014-12-04
Supplement: c4ob02267j1.pdf [file c4ob02267j1.pdf]

## Synthesis and evaluation of a boronate-tagged 1,8-naphthalimide probe for fluoride recognition

Su-Ying Xu,<sup>a</sup> Xiaolong Sun,<sup>a</sup> Haobo Ge,<sup>a</sup> Rory L. Arrowsmith,<sup>a</sup> John S. Fossey,<sup>b</sup> Sofia I. Pascu,<sup>a\*</sup> Yun-Bao Jiang<sup>c\*</sup> and Tony D. James<sup>a\*</sup>

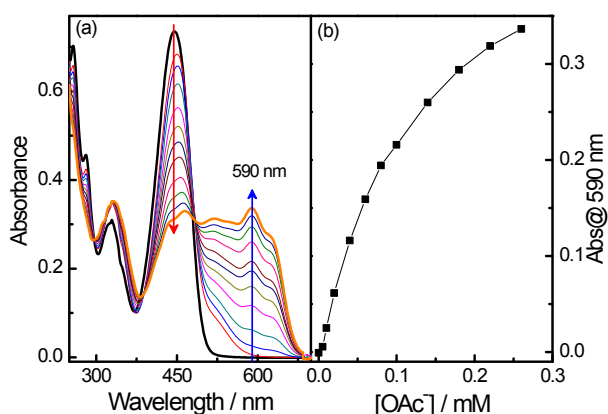

S 1 (a) Absorption spectra changes of probe **1** along with addition of TBAOAc in MeCN. [**1**] = 12  $\mu$ M  
(b) absorption changes at 590 nm of probe **1** with different concentration of TBAOAc

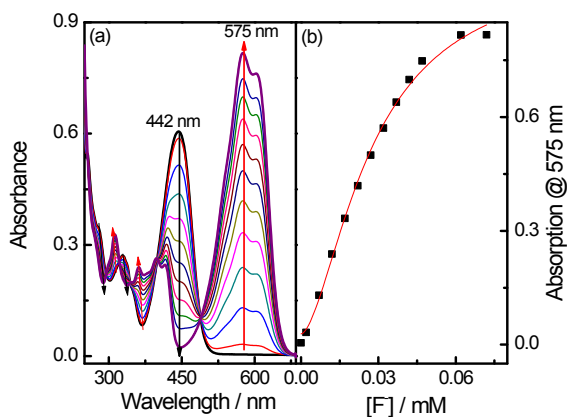

S 2 (a) Absorption spectral changes of probe **2** along with addition of TBAF in MeCN. [**2**] = 21.4  $\mu$ M  
(b) absorption changes at 575 nm of probe **2** with different concentrations of TBAF

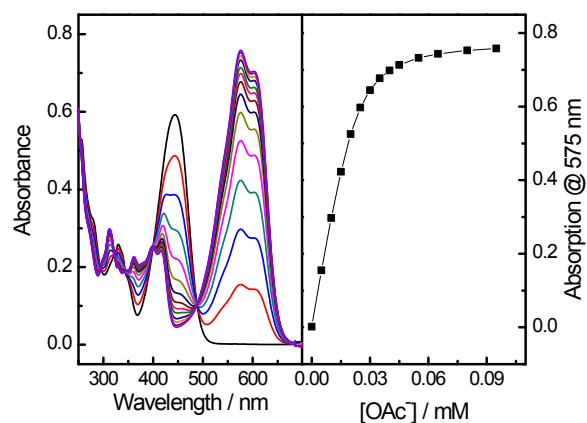

S 3 (a) Absorption spectral changes of probe **2** along with addition of TBAOAc in MeCN.  $[2] = 21.4 \mu\text{M}$  (b) absorption changes at 575 nm of probe **2** with different concentrations of TBAOAc

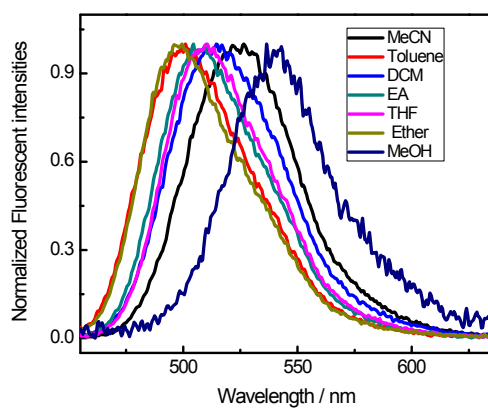

S 4 Normalized fluorescent spectra of probe **1** in different solvent. The polarity of solvent is shown in terms of dielectric constant: toluene 2.38, diethyl ether (Ether) 4.3, ethyl acetate (EA) 6.02, tetrahydrofuran (THF) 7.5, dichloromethane (DCM) 9.1, acetonitrile (MeCN) 37.5 and methanol (MeOH) 33.  $[1] = 2 \mu\text{M}$

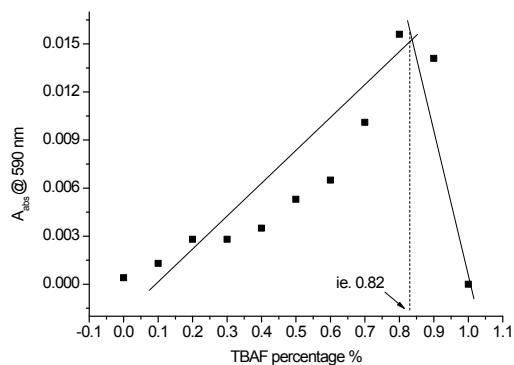

S 5 Job plot diagram for binding interaction between probe **1** and TBAF in MeCN.

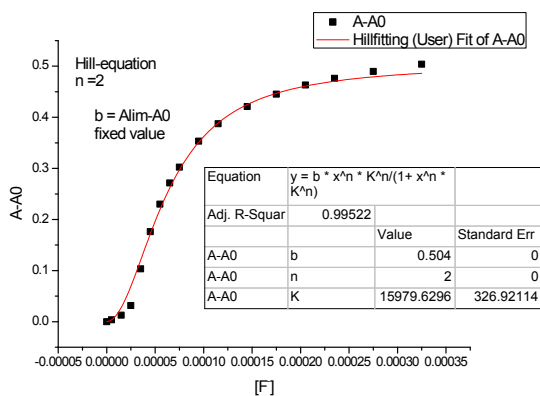

S 6 Non-linear fitting curve of probe 1 with TBAF by Hill equation

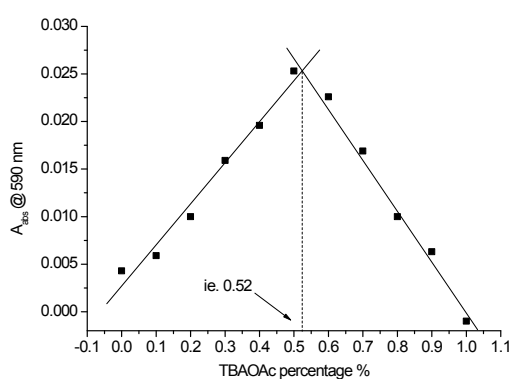

S 7 Job plot diagram for binding interaction between probe 1 and TBAOAc in MeCN..

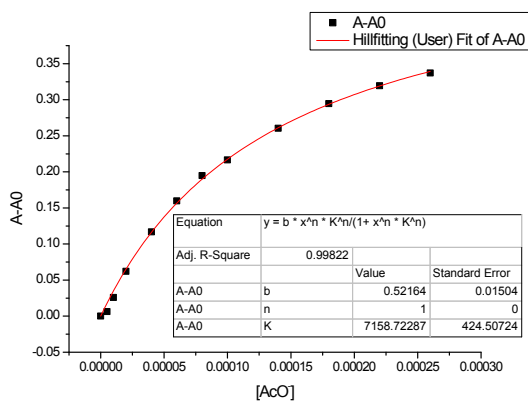

S 8 Non-linear fitting curve of probe 1 with TBAOAc by Hill equation

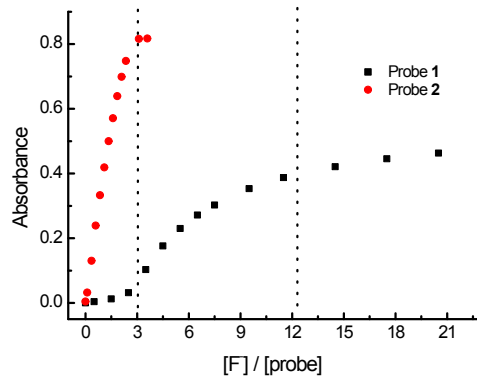

S 9 The ratio of the concentrations of TBAF to that of probe 1, 2 *versus* the absorption

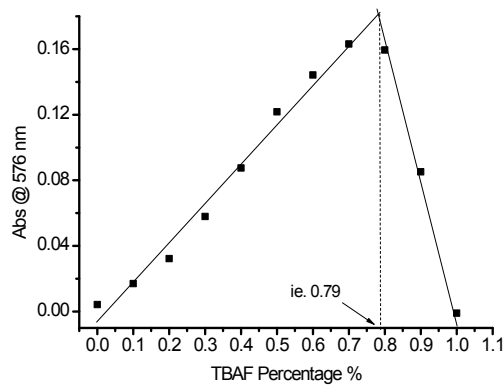

S 10 Job plot diagram for binding interaction between probe 2 and TBAF in MeCN.

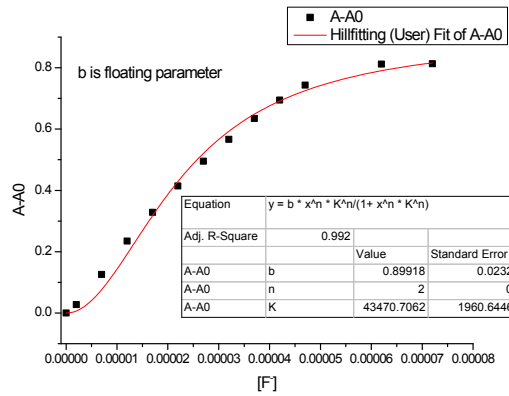

S 11 Non-linear fitting curve of probe 2 with TBAF by Hill equation

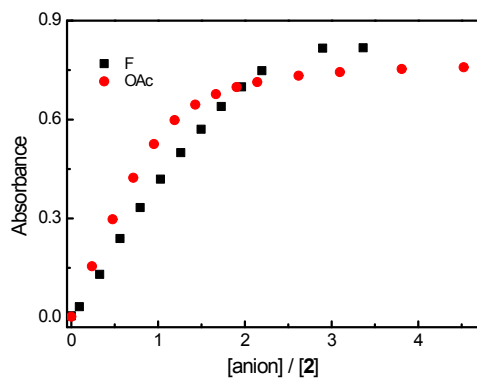

S 12 Absorptions of probe 2 with fluoride and acetate anions *versus* ratios of concentrations of anion to that of probe 2.

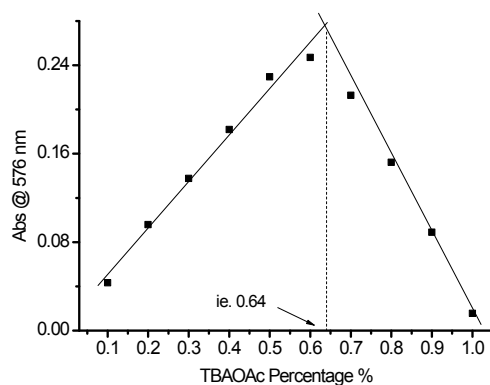

S 13 Job plot diagram for binding interaction between probe 2 and TBAOAc in MeCN

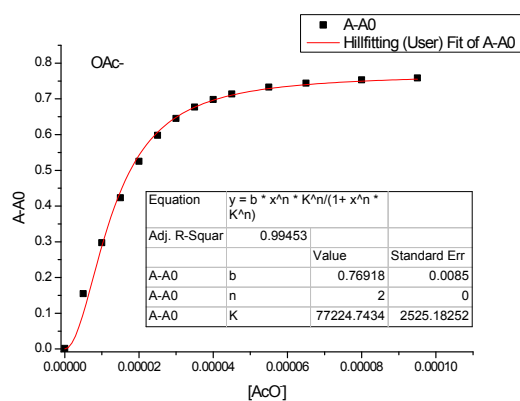

S 14 Non-linear fitting curve of probe 2 with TBAOAc by Hill equation

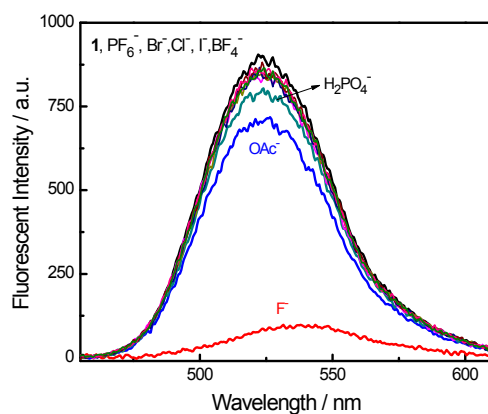

S 15 Fluorescent spectra changes after addition of 10  $\mu\text{M}$  of different anions in MeCN.  $[\mathbf{1}] = 3 \mu\text{M}$

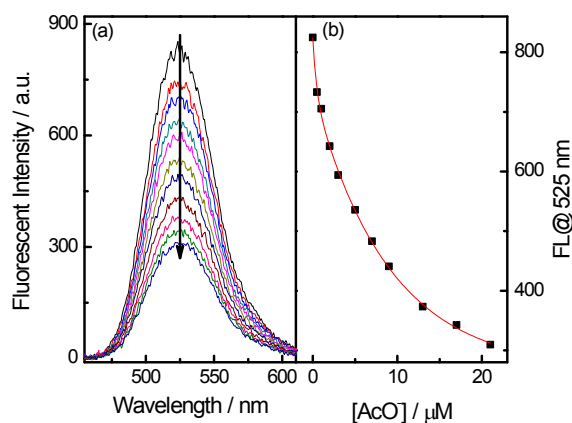

S 16 (a) Fluorescent spectra changes of probe **1** along with addition of TBAOAc in MeCN.  $[\mathbf{1}] = 3 \times 10^{-6} \text{ M}$ , excited wavelength 450 nm; (b) emission changes at 525 nm of probe **1** with different concentration of TBAOAc

S 17  $^1\text{H}$  NMR titration of probe **2** with TBAF in  $\text{DMSO-}d_6$ .  $[\mathbf{2}] = 10.7 \text{ mM}$

| [TBAF] / [2]<br>eq. | H <sup>a</sup> ppm<br>(circles) | H <sup>b</sup> ppm<br>(triangles) | H <sup>c</sup> ppm<br>(stars) |
|---------------------|---------------------------------|-----------------------------------|-------------------------------|
| 0                   | 11.501                          | 8.806                             | 10.253                        |
| 0.19                |                                 | 8.774                             |                               |
| 0.37                |                                 | 8.749                             |                               |
| 0.56                |                                 | 8.724                             |                               |
| 1.00                |                                 | 8.687                             |                               |
| 1.50                |                                 | 8.648                             |                               |
| 2.40                |                                 | 8.575                             |                               |
| 3.40                |                                 | 8.521                             |                               |

S 18 <sup>1</sup>H NMR titration of probe **1** with TBAF in DMSO-*d*<sub>6</sub>. [1] = 20 mM

| [TBAF] / [1]<br>eq. | H <sup>a</sup> ppm (circles) |          | H <sup>b</sup> ppm (triangles) |          |
|---------------------|------------------------------|----------|--------------------------------|----------|
|                     | Original peak                | New peak | Original peak                  | New peak |
| 0                   | 11.660                       |          | 8.978                          |          |
| 0.25                | 11.657                       | 11.543   | 8.978                          | 9.063    |
| 0.50                | 11.659                       | 11.545   | 8.973                          | 9.060    |
| 0.75                | 11.664                       | 11.550   | 8.973                          | 9.060    |
| 1.00                | 11.664                       | 11.553   | 8.972                          | 9.061    |
| 1.50                |                              | 11.558   | 8.966                          | 9.060    |
| 2.00                |                              | 11.556   |                                | 9.055    |
| 3.00                |                              | 11.555   |                                | 9.046    |
